# Supplementary material for: C reactive protein impairs adaptive immunity in immune cells of patients with melanoma
Source: PubMed Central journal article supplement — J Immunother Cancer. 2020 Apr 16;8(1):e000234. doi: 10.1136/jitc-2019-000234 (PMC7204799; doi:10.1136/jitc-2019-000234), 2020-04-16

# Supplemental Figure. 1

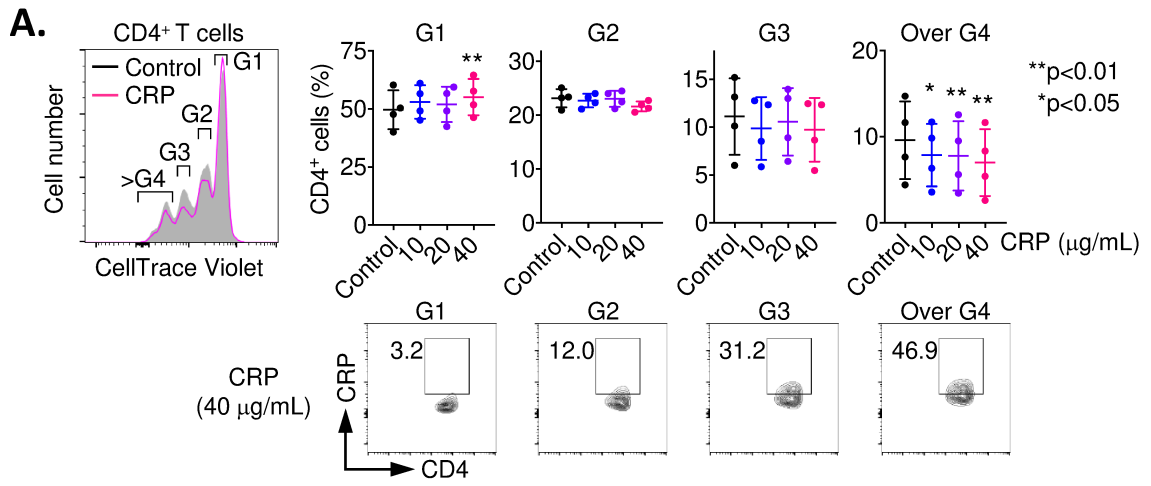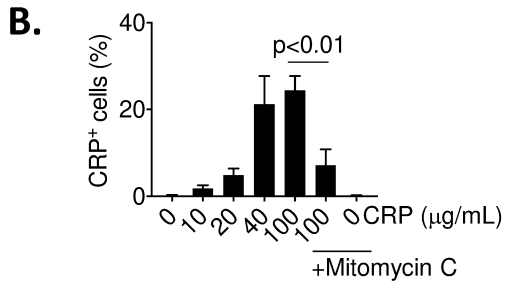

# Supplemental Figure. 2

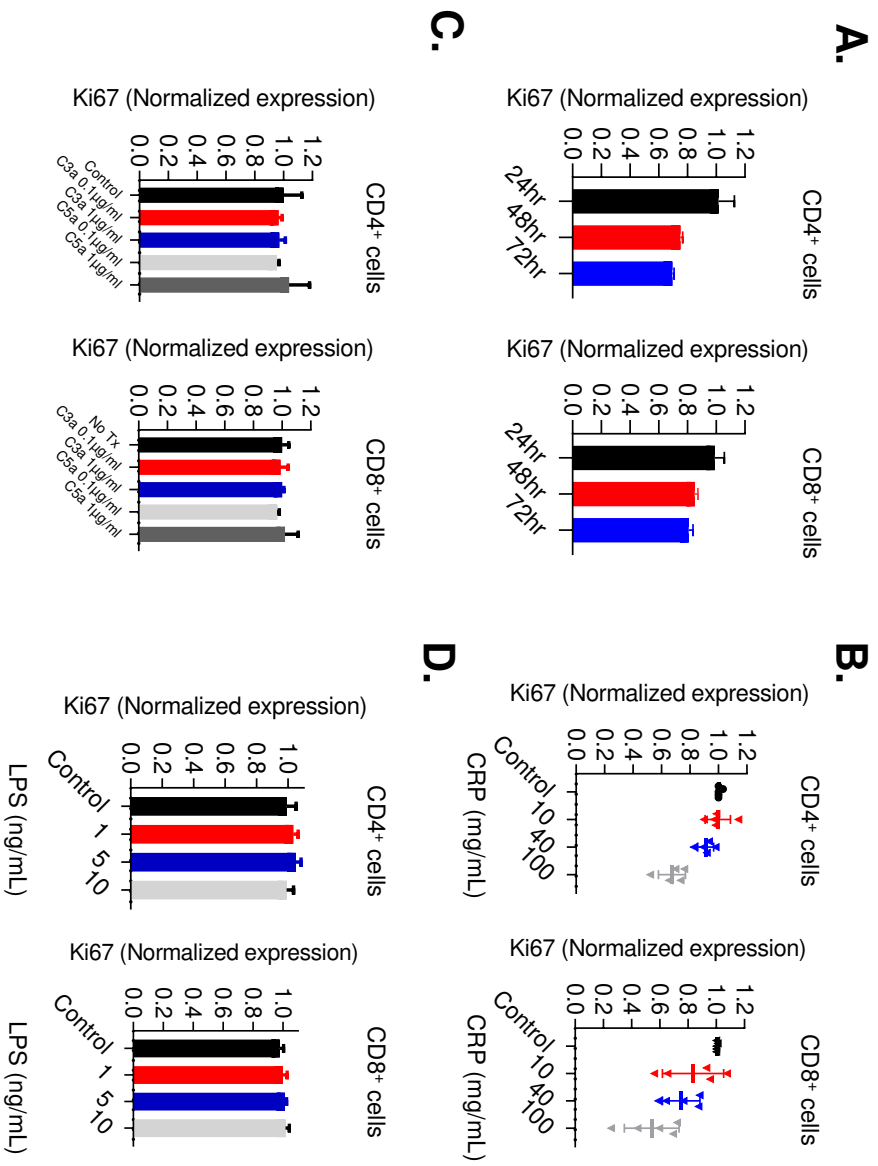

## Supplemental Figure. 3

**A.**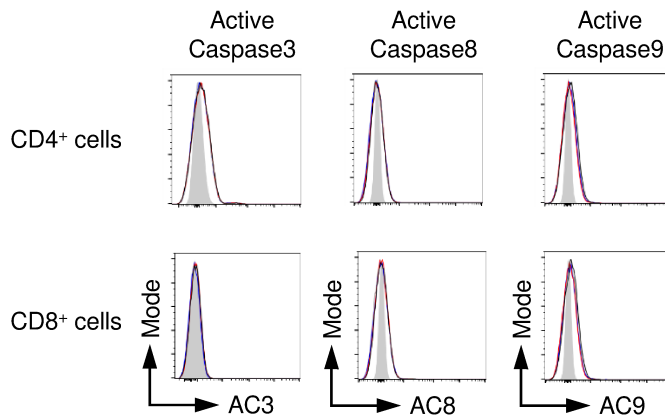**B.**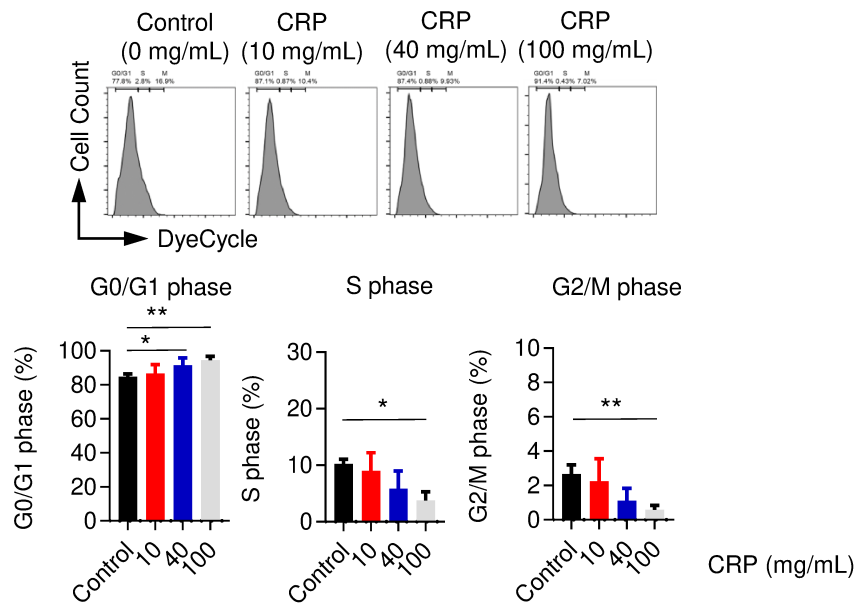**C.**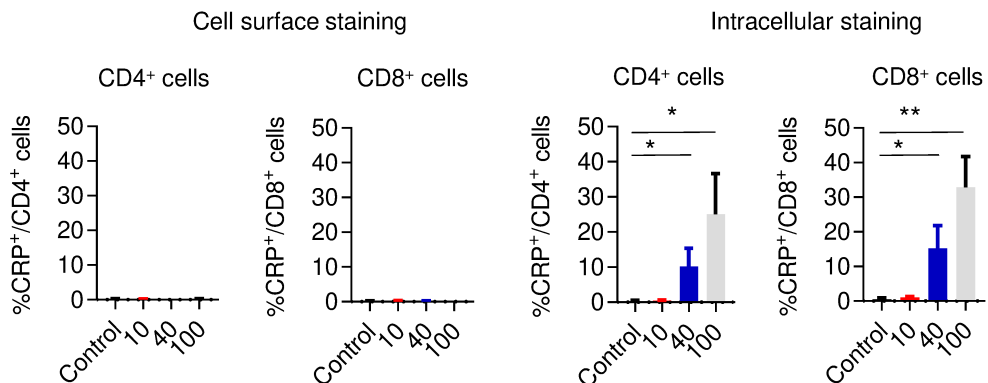

## Supplemental Figure. 4

**A.**

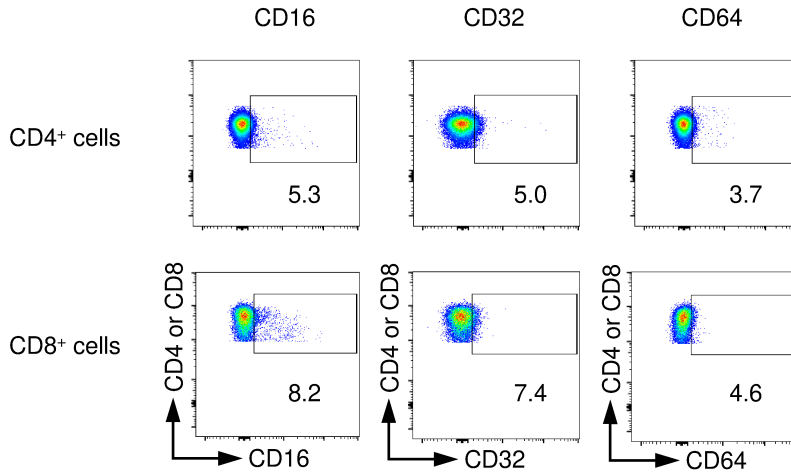

**B.**

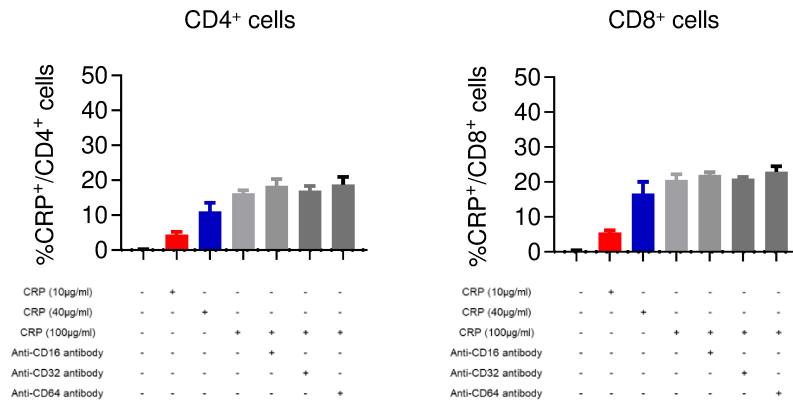

**C.**

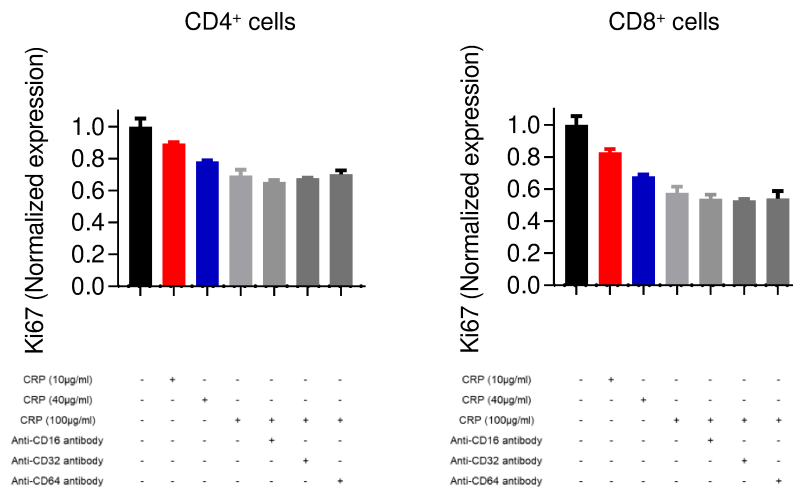

## Supplemental Figure. 5

A.

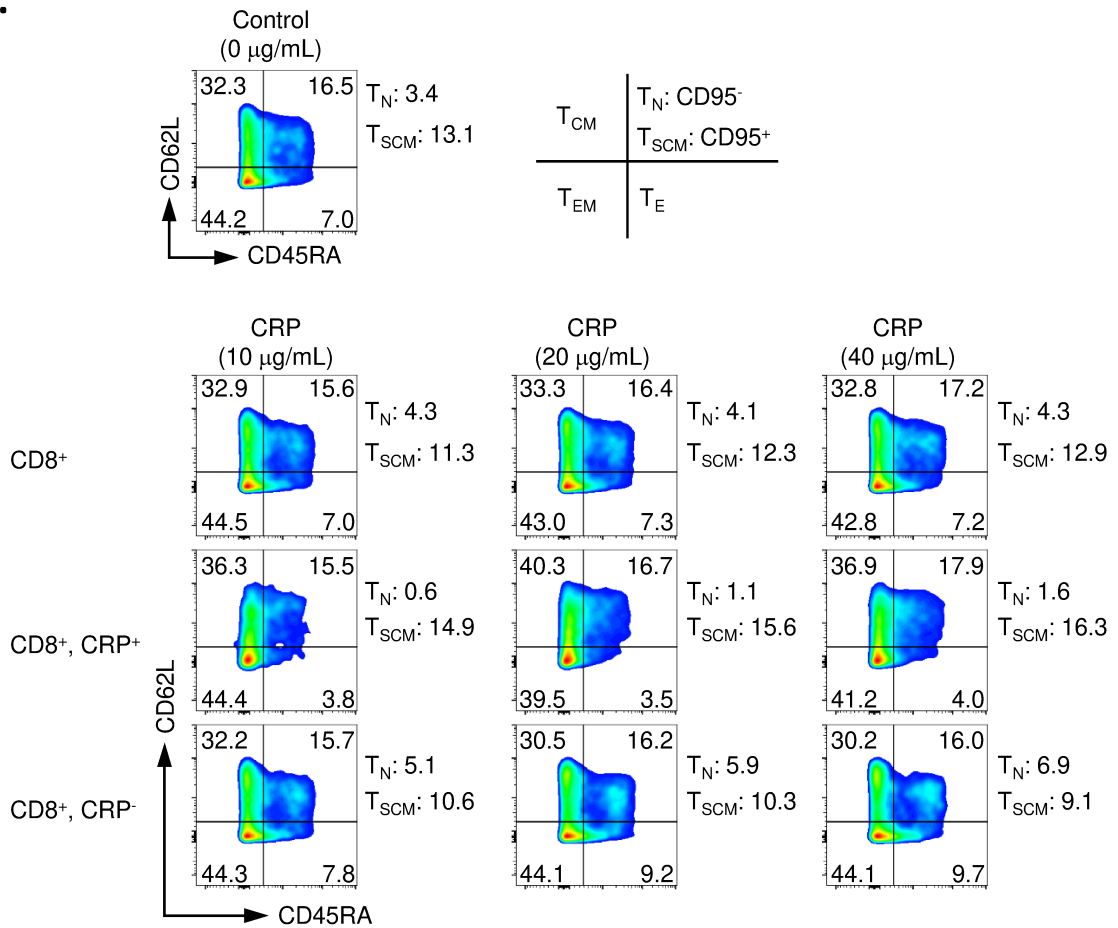

B.

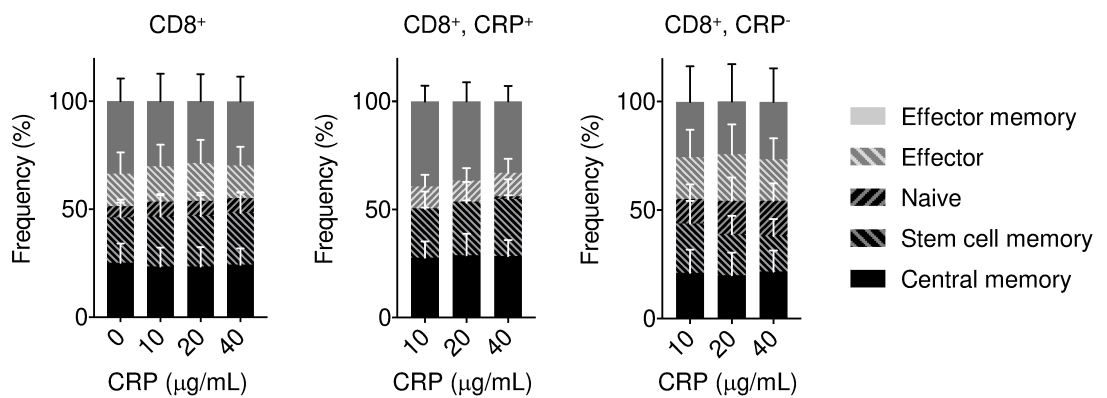

## Supplemental Figure. 6

A.

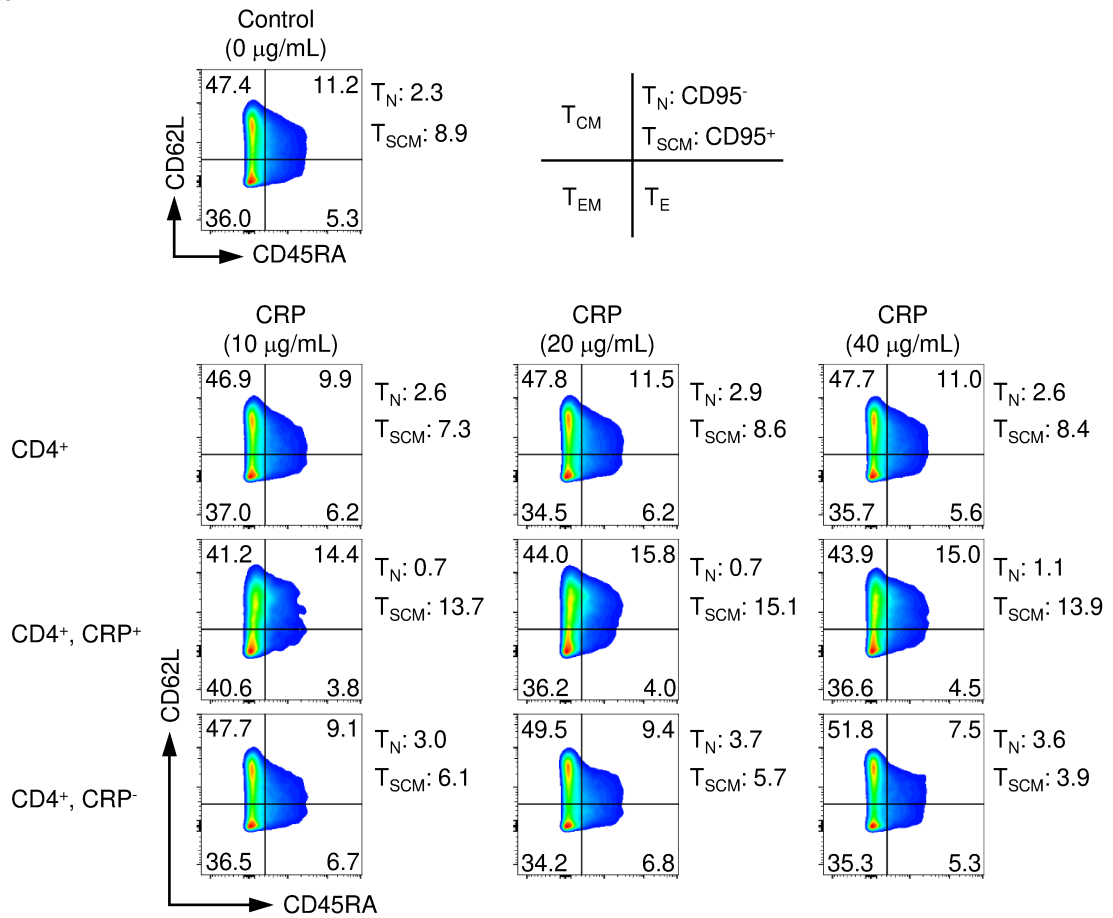

B.

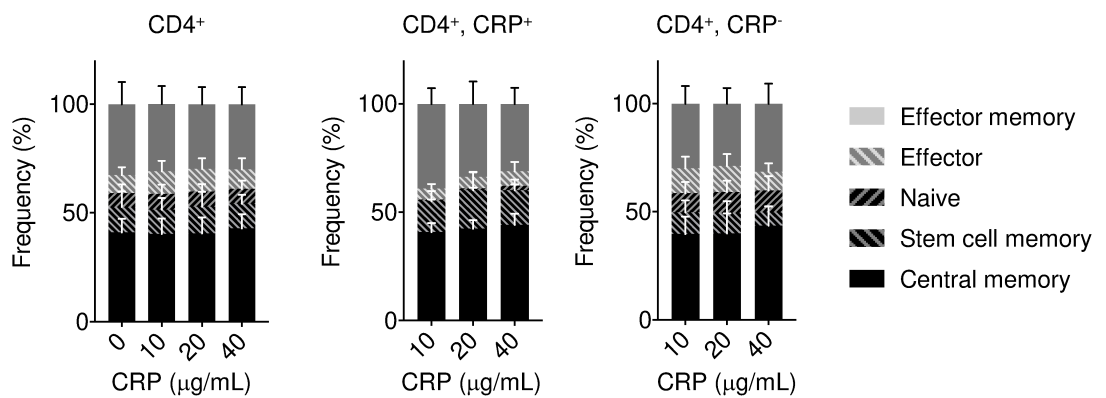

## Supplemental Figure. 7

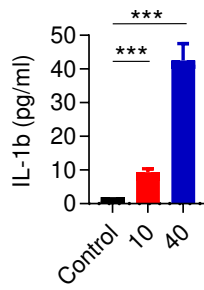

## Supplemental Figure. 8

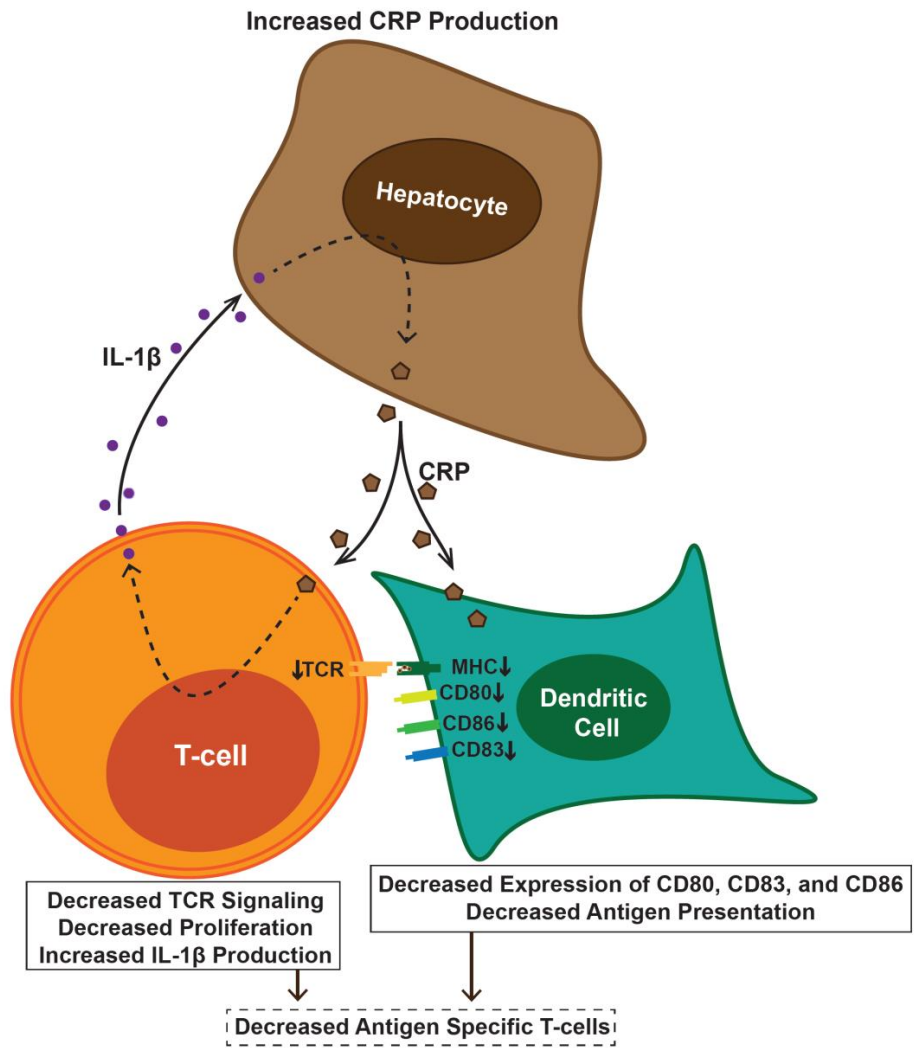

Supplement: jitc-2019-000234supp001.pdf [file jitc-2019-000234supp001.pdf]
