# Supplementary material for: C reactive protein impairs adaptive immunity in immune cells of patients with melanoma
Source: PubMed Central journal article supplement — J Immunother Cancer. 2020 Apr 16;8(1):e000234. doi: 10.1136/jitc-2019-000234 (PMC7204799; doi:10.1136/jitc-2019-000234), 2020-04-16
Supplement: jitc-2019-000234supp002.pdf [file jitc-2019-000234supp002.pdf]

**Supplemental Table 1. Patient demographics (N=95).**

|                           | Cohort A<br>N=29 | Cohort B<br>N=66 |
|---------------------------|------------------|------------------|
| Age, median (Range)       | 63 (34-81)       | 63 (19-84)       |
| Sex                       |                  |                  |
| Men                       | 24               | 44               |
| Women                     | 5                | 22               |
| Ethnic Origin             |                  |                  |
| White                     | 27               | 62               |
| Black or African-American | 1                | 2                |
| Other                     | 1                | 2                |

## Supplemental Table 2. Pathway analyses based on Enrichr assessment and KEGG 2106.

| CRP upregulated pathways                        | P-value    | Adjusted P-value<br>(q value) | Z-score | Combined<br>Score | Genes                                 |
|-------------------------------------------------|------------|-------------------------------|---------|-------------------|---------------------------------------|
| Cytokine-cytokine receptor interaction_hsa04060 | 2.316e-8   | 0.00001551                    | -1.88   | 33.00             | CCL22, CSF2, CXCL8, IL1B, CCL1, INHBA |
| Legionellosis_Homo sapiens_hsa05134             | 0.00008747 | 0.0002930                     | -1.88   | 21.87             | C3, CXCL8, IL1B                       |
| Leishmaniasis_Homo sapiens_hsa05140             | 0.00002057 | 0.0003737                     | -1.81   | 19.54             | C3, IL1B, PTGS2                       |
| Pertussis_hsa05133                              | 0.00002231 | 0.0003737                     | -1.64   | 16.58             | C3, CXCL8, IL1B                       |
| Rheumatoid arthritis_Homo sapiens_hsa05323      | 0.00003856 | 0.0004071                     | -1.63   | 10.01             | CSF2, CXCL8, IL1B                     |
| Amoebiasis_Homo sapiens_hsa05146                | 0.00005283 | 0.0004421                     | -1.68   | 16.52             | CSF2, CXCL8, IL1B                     |

  

| CRP downregulated pathways                                | P-value    | Adjusted P-value<br>(q value) | Z-score | Combined<br>Score | Genes                                              |
|-----------------------------------------------------------|------------|-------------------------------|---------|-------------------|----------------------------------------------------|
| Osteoclast differentiation_Homo sapiens_hsa04380          | 1.508e-7   | 0.000009648                   | -1.86   | 29.28             | LILRA6, SIRPA, ACP5, TREM2, FCGR1A, LILRB4, LILRB5 |
| Phagosome_Homo sapiens_hsa04145                           | 0.00007401 | 0.0002368                     | -1.68   | 19.88             | MARCO, CLEC7A, CD209, CD14, CD36, FCGR1A           |
| Staphylococcus aureus infection_Homo sapiens_hsa05150     | 0.00002554 | 0.0005449                     | -1.75   | 18.50             | FPR1, FCGR1A, C1QC, C2                             |
| Complement and coagulation cascades_Homo sapiens_hsa04610 | 0.00009917 | 0.001269                      | -1.69   | 15.61             | SERPINA1, SEPPING1, C1QC, C2                       |
| Pertussis_Homo sapiens_hsa05133                           | 0.00008096 | 0.001269                      | -1.64   | 15.46             | SERPINA1, CD14, C1QC, C2                           |
| Hematopoietic cell lineage_Homo sapiens_hsa04640          | 0.0001508  | 0.001608                      | -1.64   | 14.44             | CSF3R, CD14, CD36, FCGR1A                          |
